# Supplementary material
Source: HighWire-hosted journal article supplement (https://www.cancerbiomed.org/content/19/4/504)
Supplement: media-1 [file media-1.pdf]

# Supplementary materials

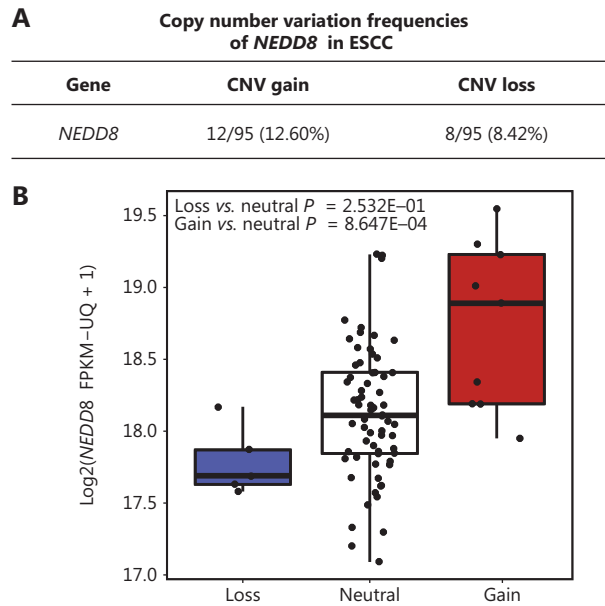

**Figure S1** The copy number variation (CNV) frequencies of *NEDD8* in ESCC, calculated from the TCGA database. (A) The CNV gain for *NEDD8* in ESCC was 12.60% and the CNV loss for *NEDD8* was 8.42%. (B) The association between CNV and *NEDD8* gene expression was calculated with standard ANOVA and Tukey's HSD tests.

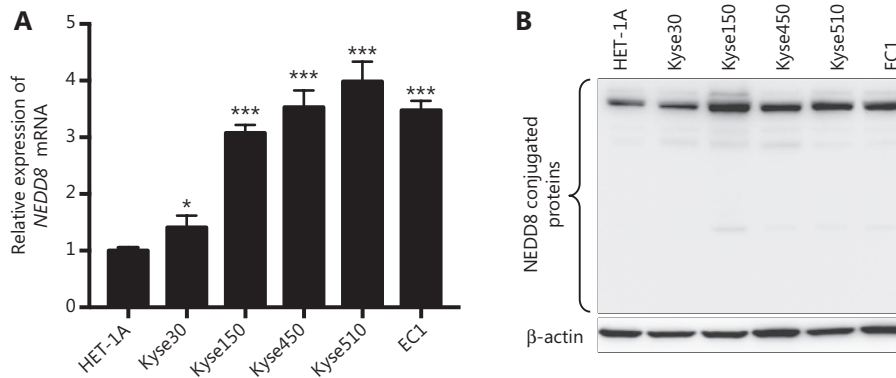

**Figure S2** The mRNA and protein levels of *NEDD8* are higher in ESCC cell lines than in non-cancerous cells. (A) mRNA and (B) protein expression levels of *NEDD8* in HET-1A, Kyse30, Kyse150, Kyse450, Kyse510, and EC1 cell lines, determined with real-time PCR and immunoblotting, respectively. \* $P < 0.05$ , \*\*\* $P < 0.001$ .

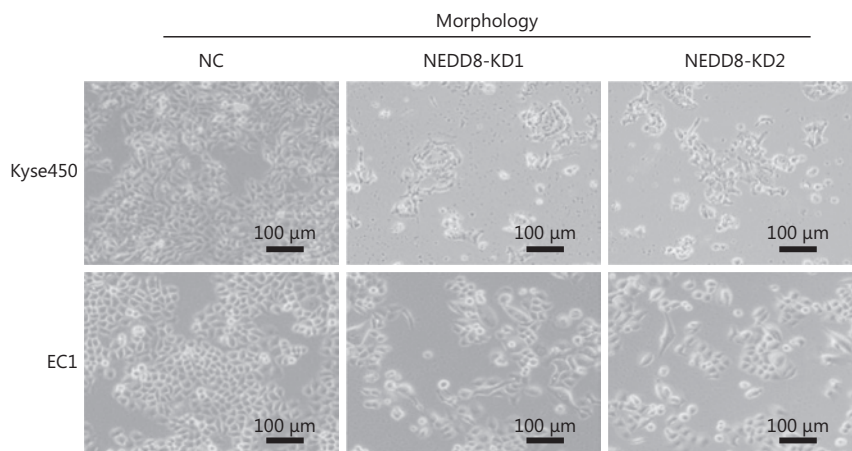

**Figure S3** NEDD8 knockdown suppresses the growth of the Kyse450 cells and EC1 cells. Representative micrographs of NEDD8-knockdown Kyse450 and EC1 cells are shown; scale bar = 100 μm.

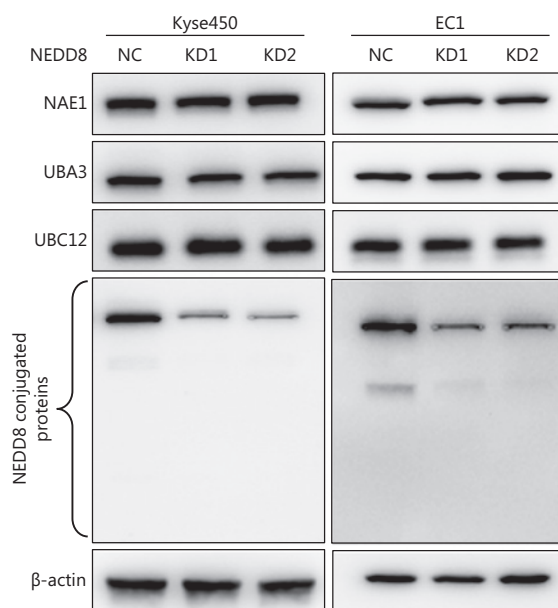

**Figure S4** NEDD8 knockdown does not affect the protein levels of neddylation enzymes. The expression levels of NAE1, UBA3, and UBC12 in NEDD8-knockdown ESCC cells were determined by immunoblotting.

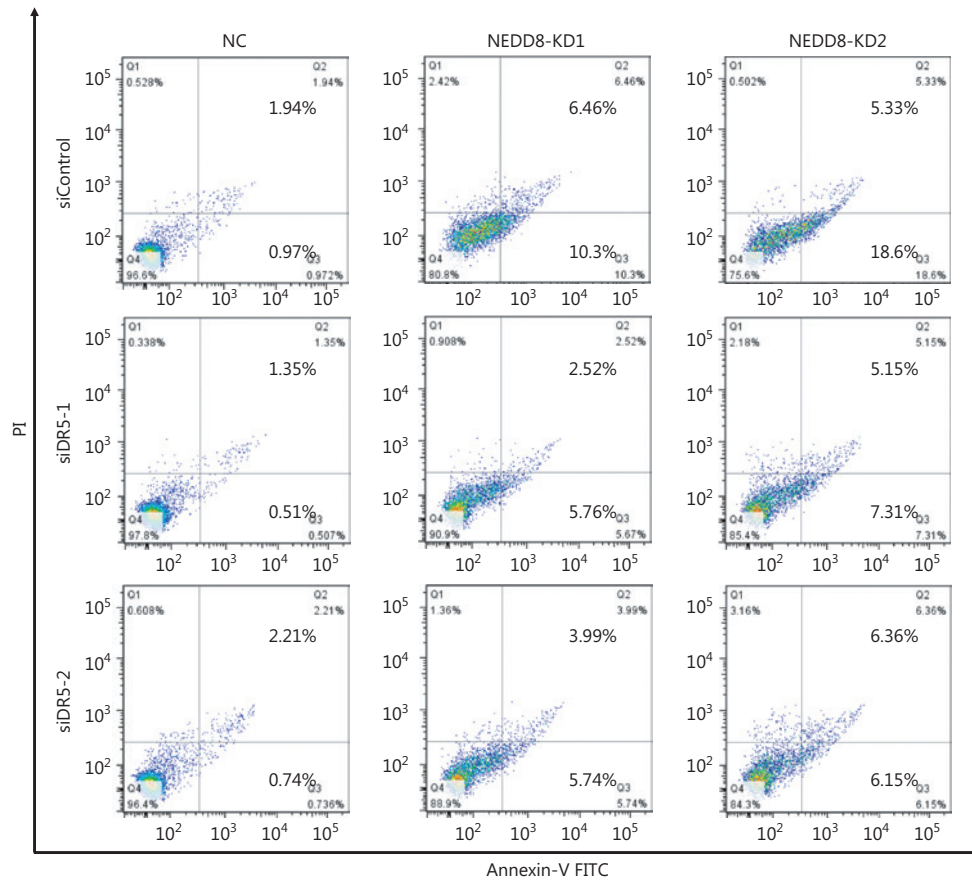

**Figure S5** Downregulation of DR5 rescues the apoptosis induced by NEDD8 knockdown in Kyse450 cells. NEDD8-knockdown Kyse450 cells transfected with siControl or siDR5 were subjected to Annexin V–FITC/PI double-staining analysis.

**Table S1** Clinicopathologic parameters according to the expression of NEDD8

| Variable                | Overall No. | NEDD8         |                | <i>P</i> |
|-------------------------|-------------|---------------|----------------|----------|
|                         |             | Low, <i>n</i> | High, <i>n</i> |          |
| Age ( <i>n</i> = 95)    |             |               |                | 0.956    |
| < 60 years              | 22          | 5             | 17             |          |
| ≥ 60 years              | 73          | 17            | 56             |          |
| Gender ( <i>n</i> = 95) |             |               |                | 0.256    |
| Male                    | 77          | 16            | 61             |          |
| Female                  | 18          | 6             | 12             |          |
| Tumor ( <i>n</i> = 88)  |             |               |                | 0.052    |
| T1                      | 3           | 2             | 1              |          |
| T2                      | 19          | 1             | 18             |          |
| T3                      | 64          | 17            | 47             |          |
| T4                      | 2           | 0             | 2              |          |
| Node ( <i>n</i> = 95)   |             |               |                | 0.820    |
| N <sub>0</sub>          | 47          | 9             | 38             |          |
| N <sub>1</sub>          | 28          | 8             | 20             |          |
| N <sub>2</sub>          | 16          | 4             | 12             |          |
| N <sub>3</sub>          | 4           | 1             | 3              |          |
| TNM ( <i>n</i> = 88)    |             |               |                | 0.704    |
| I                       | 6           | 2             | 4              |          |
| II                      | 39          | 7             | 32             |          |
| III                     | 37          | 10            | 27             |          |
| IV                      | 6           | 1             | 5              |          |
